# Supplementary material for: Combined anticoagulant and antiplatelet therapy is associated with an improved outcome in hospitalised patients with COVID-19: a propensity matched cohort study
Source: HighWire-hosted journal article supplement (doi:10.1136/openhrt-2021-001785), 2021-10-01
Supplement: openhrt-2021-001785supp001_data_supplement.pdf [file openhrt-2021-001785supp001_data_supplement.pdf]

## Supplementary Material

**Table 3: Mortality model: 2 by 2**

|            | ProphAC | TherAC | ProphAC+AP | TherAC+AP |
|------------|---------|--------|------------|-----------|
| ProphAC    |         | 0.075  | 0.770      | 0.003     |
| TherAC     | 0.075   |        | 0.429      | 0.809     |
| ProphAC+AP | 0.770   | 0.429  |            | 0.039     |
| TherAC+AP  | 0.003   | 0.809  | 0.039      |           |

**Table 4: Propensity Score for anticoagulation(a) and antiplatelet prescription(b)****(a) Propensity score for anticoagulation prescription****Variables in the Equation**

|              | B     | S.E. | Wald  | df | Sig. | Exp(B) | 95% C.I. for EXP(B) |        |
|--------------|-------|------|-------|----|------|--------|---------------------|--------|
|              |       |      |       |    |      |        | Lower               | Upper  |
| Admission HR | -.028 | .010 | 7.658 | 1  | .006 | .973   | .954                | .992   |
| CHF          | 1.534 | .712 | 4.638 | 1  | .031 | 4.637  | 1.148               | 18.731 |

a. Variable(s) entered on step 1: Age, Gender, Smoker, Weight, AdmissionHR, AdmissionTemperature, AdmissionOxygenSaturation, HTN, Dyslipidemia, CHF, Cancer, DM, HistoryBleeding, Liverdisease, KidneyDisease, COPD, CAD, PreviousVTE, PlateletCount, SMEAN(ddimers), SMEAN(CRP), SMEAN(Interleukin6), AnticoagulationAdmission, SMEAN(Fibrinogen), SMEAN(Troponin).

**(b) Propensity scores for antiplatelet prescription****Variables in the Equation**

|                      | B     | S.E.  | Wald   | df | Sig. | Exp(B)    | 95% C.I. for EXP(B) |           |
|----------------------|-------|-------|--------|----|------|-----------|---------------------|-----------|
|                      |       |       |        |    |      |           | Lower               | Upper     |
| Gender               | -.910 | .348  | 6.820  | 1  | .009 | .403      | .203                | .797      |
| Smoker               | -.667 | .370  | 3.257  | 1  | .071 | .513      | .249                | 1.059     |
| AdmissionTemperature | -.382 | .160  | 5.680  | 1  | .017 | .682      | .498                | .934      |
| COPD                 | 5.439 | 3.007 | 3.271  | 1  | .070 | 230.290   | .635                | 83580.632 |
| SMEAN(ddimers)       | -.530 | .148  | 12.782 | 1  | .000 | .589      | .440                | .787      |
| AntiPAdmission       | 2.772 | .720  | 14.838 | 1  | .000 | 15.985    | 3.902               | 65.495    |
| Constant             | 9.237 | 6.494 | 2.023  | 1  | .155 | 10271.108 |                     |           |

a. Variable(s) entered on step 1: Age, Gender, Smoker, Weight, AdmissionHR, AdmissionTemperature, AdmissionOxygenSaturation, HTN, Dyslipidemia, CHF, Cancer, DM, HistoryBleeding, Liverdisease, KidneyDisease, COPD, CAD, PreviousVTE, PlateletCount, SMEAN(ddimers), SMEAN(CRP), SMEAN(Interleukin6), AntiPAdmission, SMEAN(Fibrinogen), SMEAN(Troponin).
